# Supplementary material for: Preclinical development of CD126 CAR-T cells with broad antitumor activity
Source: PubMed Central journal article supplement (PMC7791061; doi:10.1038/s41408-020-00405-z), 2021-01-04
Supplement: 41408_2020_405_MOESM1_ESM.pdf [file 41408_2020_405_MOESM1_ESM.pdf]

## Supplementary information

### **Supplementary Figure 1. CD126 is ubiquitously expressed on tumor cells and is a prognostic marker.**

(A) CD126 mRNA expression (RMA log<sub>2</sub> signal intensity) was measured across 36 cancer type cell lines (n=917). (B) Median Fluorescence intensity (MFI) of CD126 expression in CD138<sup>+</sup> multiple myeloma (n=24) cells isolated from bone marrow compared to normal plasma cells (n=7). (C) MFI for CD126 expression in CD19<sup>+</sup> ALL cells (n=5) compared to CD19<sup>+</sup> normal B-cells (n=7). (D) mRNA expression of CD126 in AML (n=173) compared normal control cells (n=70). Mann-Whitney U test: \*P<0.05.

**Supplementary Figure 2. Development of a CD126 targeted CAR.** Transduction efficiency of primary T cells was estimated with flow cytometry using (A) a biotinylated recombinant human CD126 protein for scFv rhMP-1 and (B) mCherry reporter gene for scFv VQ8F11. (C) CD126 knock-down in RPMI cell line was confirmed with flow cytometry. (D) CD126 over-expression in K562 cell line was confirmed with flow cytometry. Comparison of the killing efficiency for two CD126 directed CAR, CD19 directed CAR and Mock T-cells were tested against (E) RPMI 8226, (F) U266 and (G) MM.1S cells. Bioluminescence cell killing was performed in ultrachilli-luciferase expressing cancer cell lines when co-cultured with either CAR-T or mock T cell at effector to target ratios of 10, 5, 1, 0.2 and 0.1 (n=12). Percent specific lysis was quantified after 16 hours of incubation. Two-way ANOVA and multiple comparison test. ns = not significant, \*P<0.05, \*\*P<0.01, \*\*\*P<0.001 and \*\*\*\*P<0.0001.

**Supplementary Figure 3. CD126 targeted CAR-T cells demonstrated potent in vitro activity against multiple tumor cell lines.** Bioluminescence cell killing was performed in ultrachilli-luciferase expressing cancer cell lines, (A) U266B1, (B) MM.1S, (C) KMS-12-PE, (D) SU-DHL-1, (E) KARPASS 299, (F) 624-mel, (G) Jurkat, (H) MOLT-4, (I) LNCaP, (J) Hep G2, (K) A549 and (L) U-251 MG when co-cultured with either CAR-T or mock T cell at effector to target ratios of 10, 5, 1, 0.2 and 0.1 (n=12). Percent specific lysis was quantified after 16 hours of incubation. Two-way ANOVA and multiple comparison test. ns = not significant, \*P<0.05, \*\*P<0.01, \*\*\*P<0.001 and \*\*\*\*P<0.0001.

**Supplementary Figure 4. CD126 targeted CAR-T cells demonstrated potent in vitro activity against primary ALL cells.** Cell killing of primary ALL cells from four patients was measured by calcein AM labelled cells when co-cultured with either CAR-T or mock T cells at effector to target ratio of 10, 5, 2.5, 1, 0.2 and 0.1 after 16 hours of incubation (n=10). Two-way ANOVA and multiple comparison test. Ns = non-significant, \* $P < 0.05$ , \*\* $P < 0.01$ , \*\*\* $P < 0.001$  and \*\*\*\* $P < 0.0001$ .

**Supplementary Figure 5. CD126 targeted CAR-T cells bind to sIL6R and do not induce toxicity in a murine model.** (A) sIL6R was measured in conditioned media from RPMI, HL-60, DU 145 and K562 cells by ELISA. Mock T cell or CAR-T cells were cultured in conditioned media from sIL6R producing cells for 12 hours and sIL6R was quantified in media supernatant with ELISA (n=3). (B) Bioluminescence cell killing was performed in ultrachilli-luciferase expressing RPMI when co-cultured with CAR-T cells at effector to target ratios of 10, 5, 2.5 and 1 (n=12) with or without recombinant human sIL6R (50ng/ml). Percentage specific lysis was quantified after 16 hours of incubation. (C) Binding affinity for mouse IL6R was determined by flow cytometry after incubating with increasing dose of mouse IL6R-His and anti-His-PE antibody. (D) Serial body weight measurements for mice that either received mock T cells (n=5) or CAR-T cells (n=5). (E) Weight of the explanted liver in mice, 2 weeks after injection with mock T cells (n=5) or CAR-T cells (n=5). (F) Aspartate aminotransferase (AST) was measured in plasma of mice injected with mock T cells (n=5) or CAR-T cells (n=4). (G) Mouse SAA-3 was measured in murine plasma 2 weeks after injection with either mock T cells (n=5) or CAR-T cells (n=4). (H) Human IFN $\gamma$  was measured in murine plasma 2 weeks after injection with mock T cells (n=5) or CAR-T cells (n=4). Mann-Whitney *U* test. Two-way ANOVA and multiple comparison test. NS = not significant, \* $P < 0.05$ , \*\* $P < 0.01$ , \*\*\* $P < 0.001$  and \*\*\*\* $P < 0.0001$ .

**Supplementary Figure 6. CD126 targeted CAR-T cells have potent antitumor activity but do not kill autologous immune cells.** (A) Tumor burden (D-luciferin BLI of DU-145-ultrachilli-luciferase) mice were quantified on day 10, 14 and 16. (B) ELISA was performed to quantify plasma level of human IFN $\gamma$ , mouse SAA-3 and human s-IL6R in mice with RPMI-ultrachilli-luciferase expressing tumor xenografts that either

received mock T cells (n=5) or CAR-T cells (n=5). (C) ELISA was performed to quantify plasma level of human IFN $\gamma$ , mouse SAA-3 and human s-IL6R in mice (DU145-ultrachilli-luciferase) that either received mock T cells (n=5) or CAR-T cells (n=5). CD126 targeted CAR-T cells do not kill autologous PBMC or B cells, T cells, monocytes, or NK cells. (D) RPMI 8226 cells were used as a positive control for the assay. RPMI 8226 killing was measured by flow cytometry. (E) PBMC killing was measured by flow cytometry by quantifying CFSE labelled cells when co-cultured with mock T-cells or CD126 targeted CAR-T cells. B cell killing was determined with flow cytometry by quantifying CD19 positive cells in CFSE labelled PBMC cells when co-cultured with mock T-cells or CD126 targeted CAR-T cells. T-cell killing was determined by flow cytometry by quantifying the fraction of CD3 positive cells in CFSE labelled PBMC cells after co-culture with mock T-cells or CD126 targeted CAR-T cells. Monocyte killing was measured by flow cytometry by quantifying the fraction of CD14 positive cells in CFSE labelled PBMC cells when co-cultured with mock T-cells or CD126 targeted CAR-T cells. NK cell killing was measured by flow cytometry by quantifying the fraction of CD56 positive cells in CFSE labelled PBMC cells when co-cultured with mock T-cells or CD126 targeted CAR-T cells. n=3, healthy human donor. Mann-Whitney *U* non-parametric test. Two-way ANOVA and multiple comparison test. ns = not significant, \* $P < 0.05$ , \*\* $P < 0.01$ , \*\*\* $P < 0.001$  and \*\*\*\* $P < 0.0001$ .

A

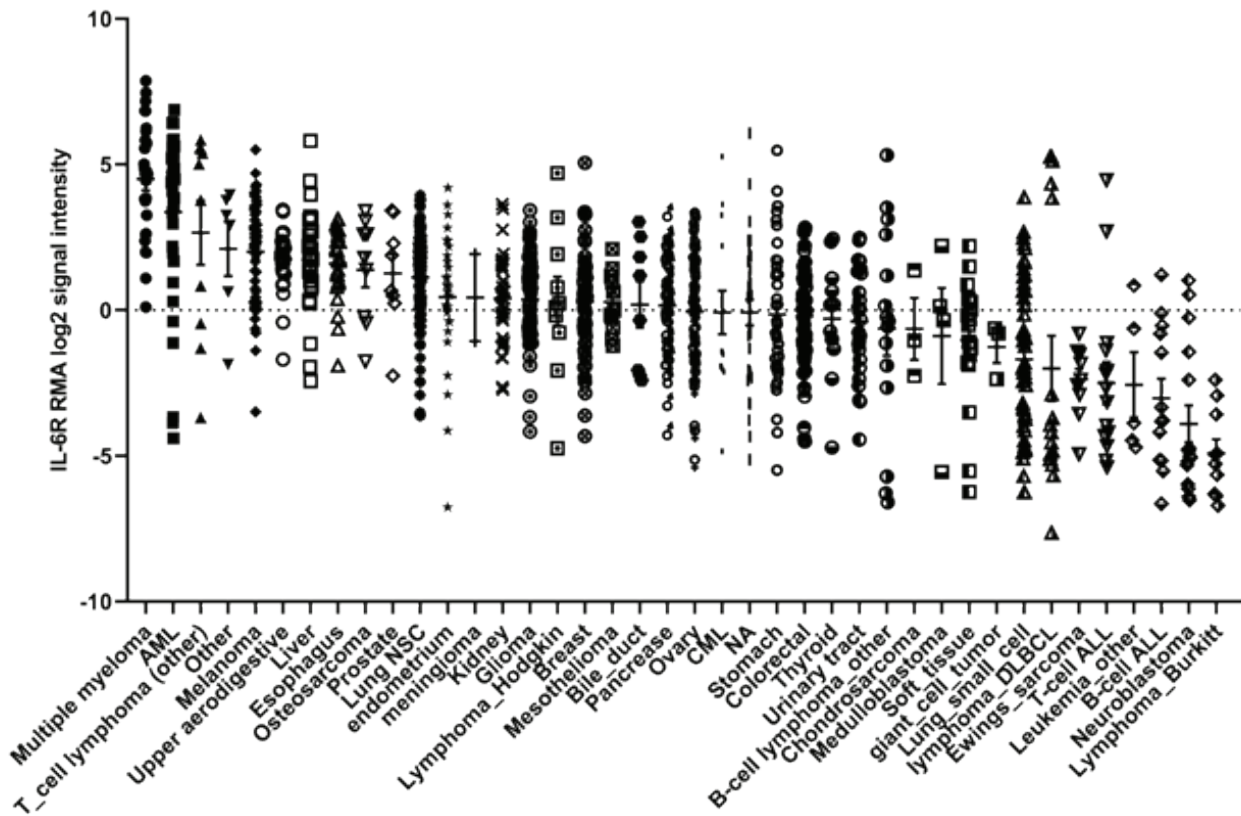

B

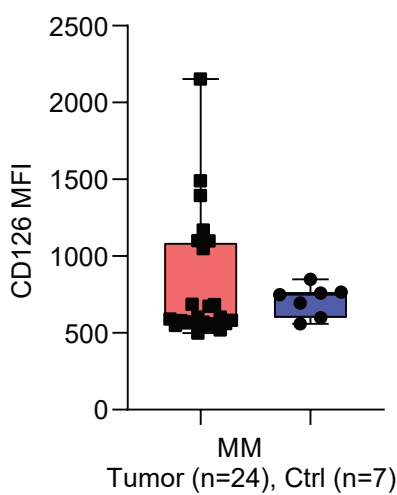

C

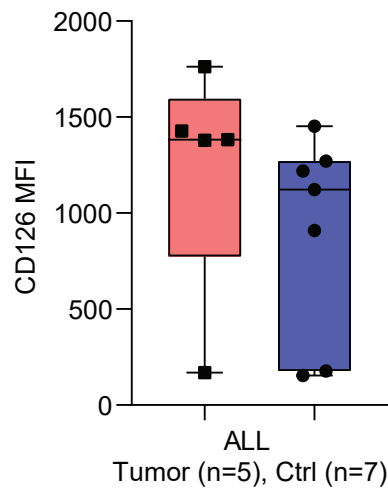

D

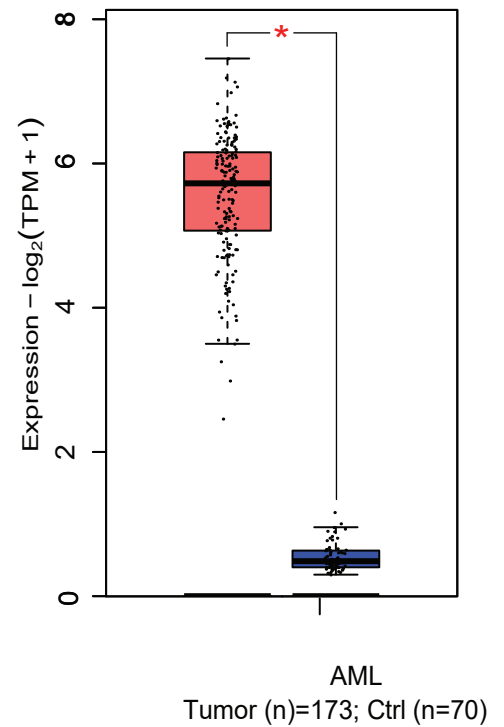

Figure 1

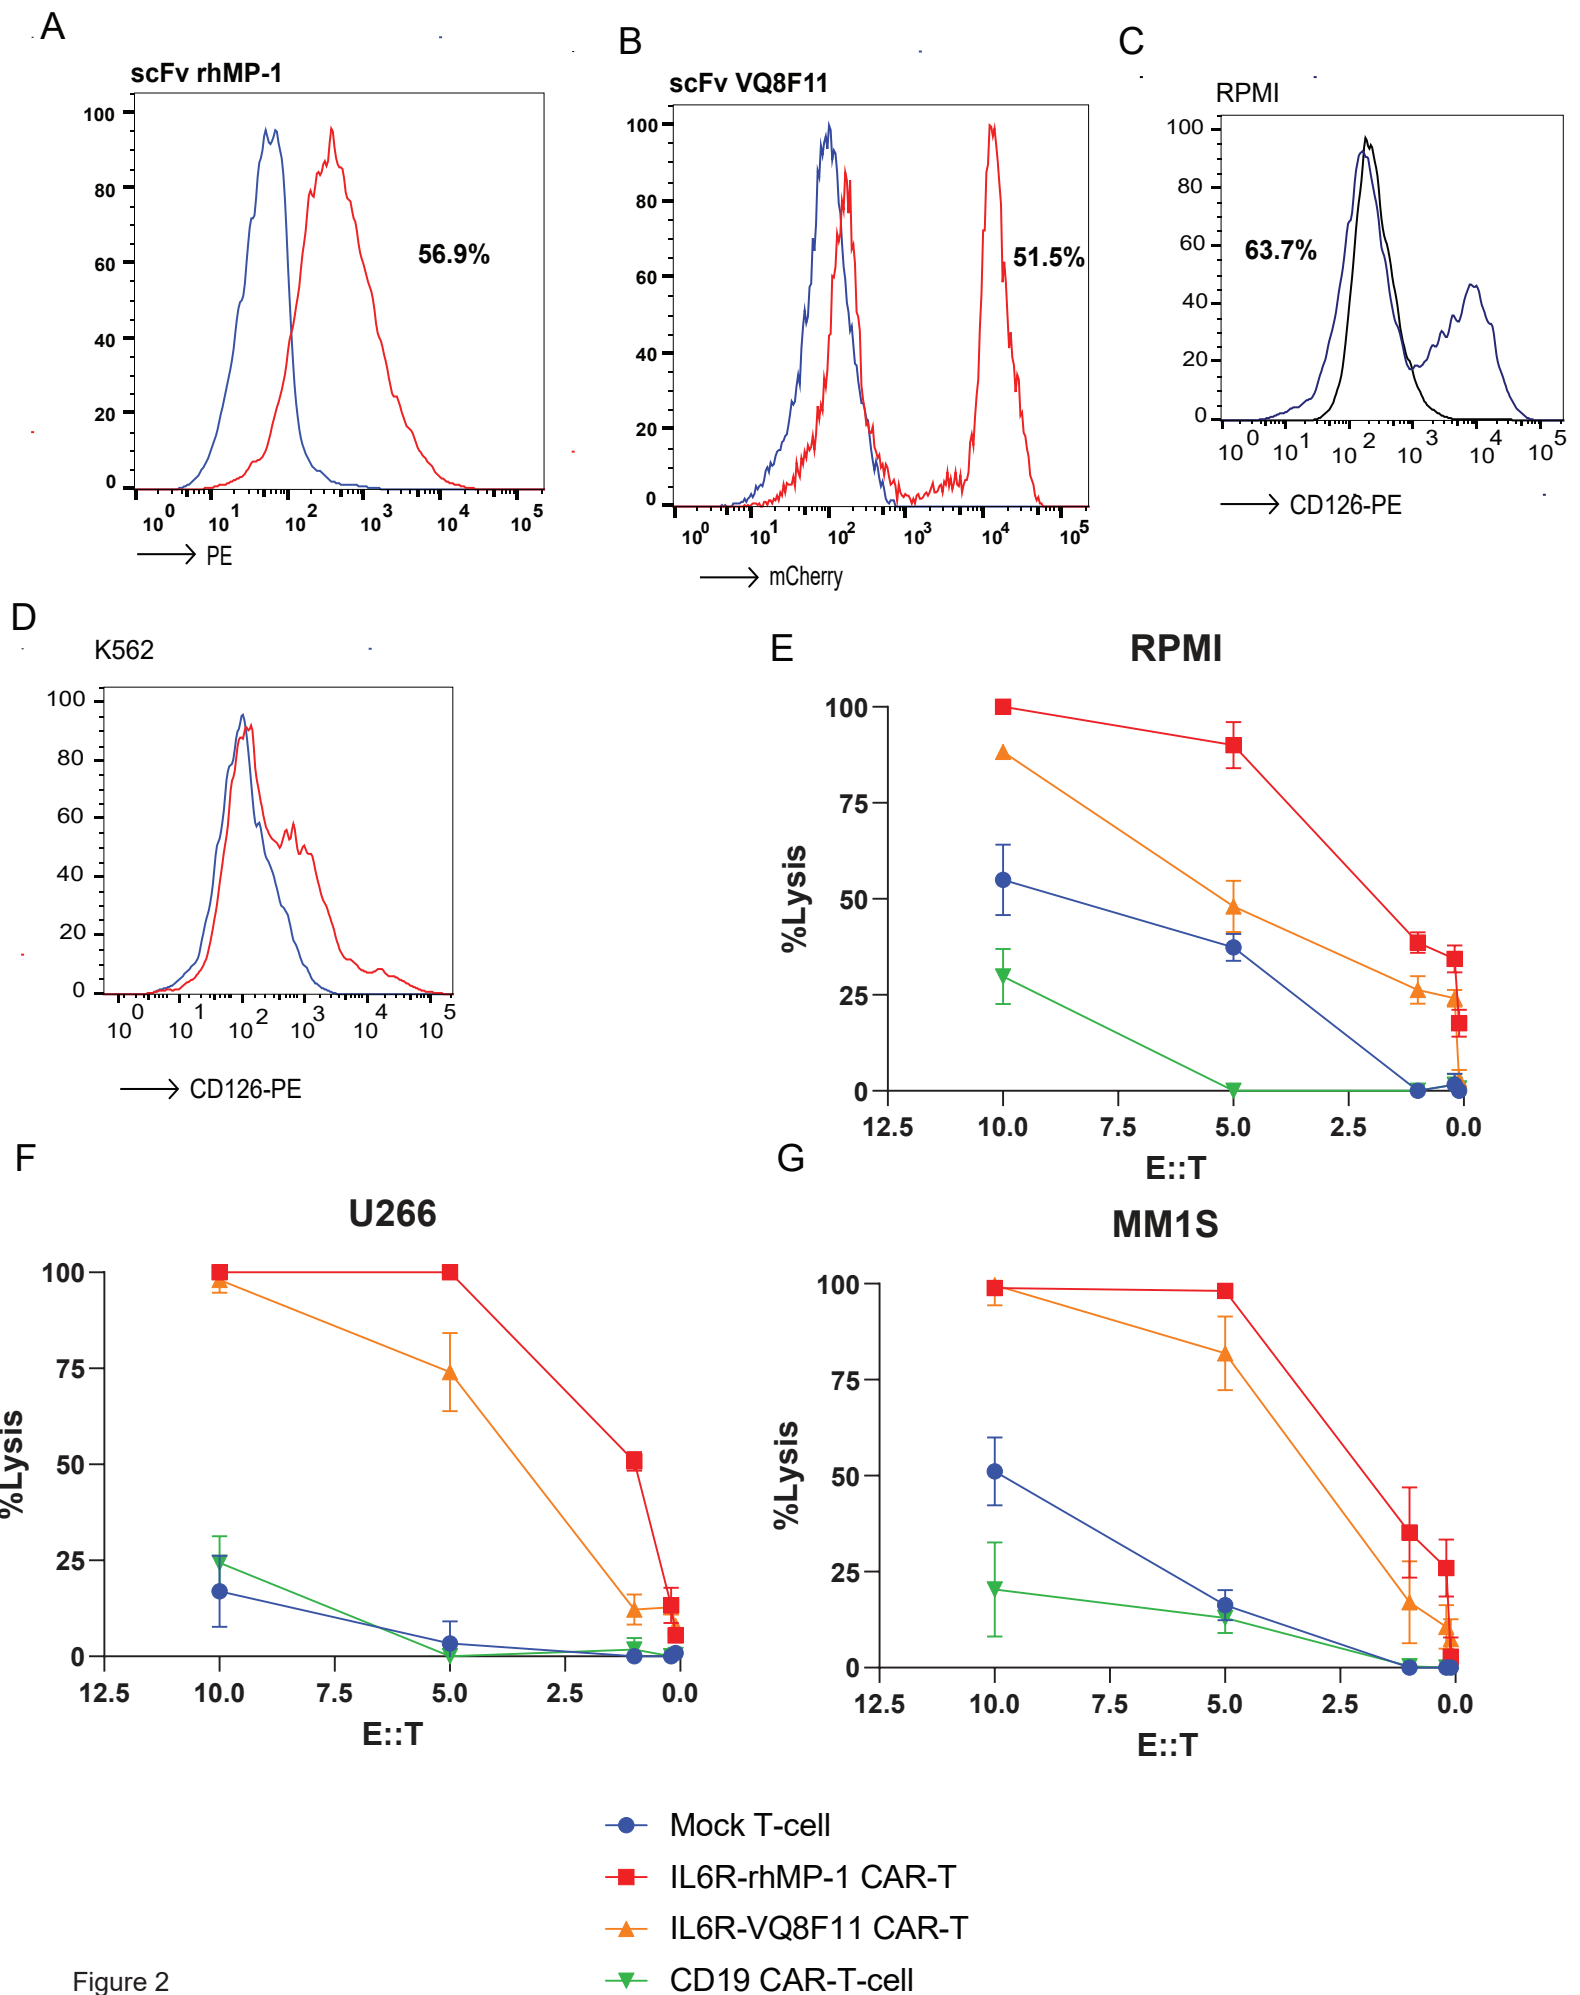

Figure 2

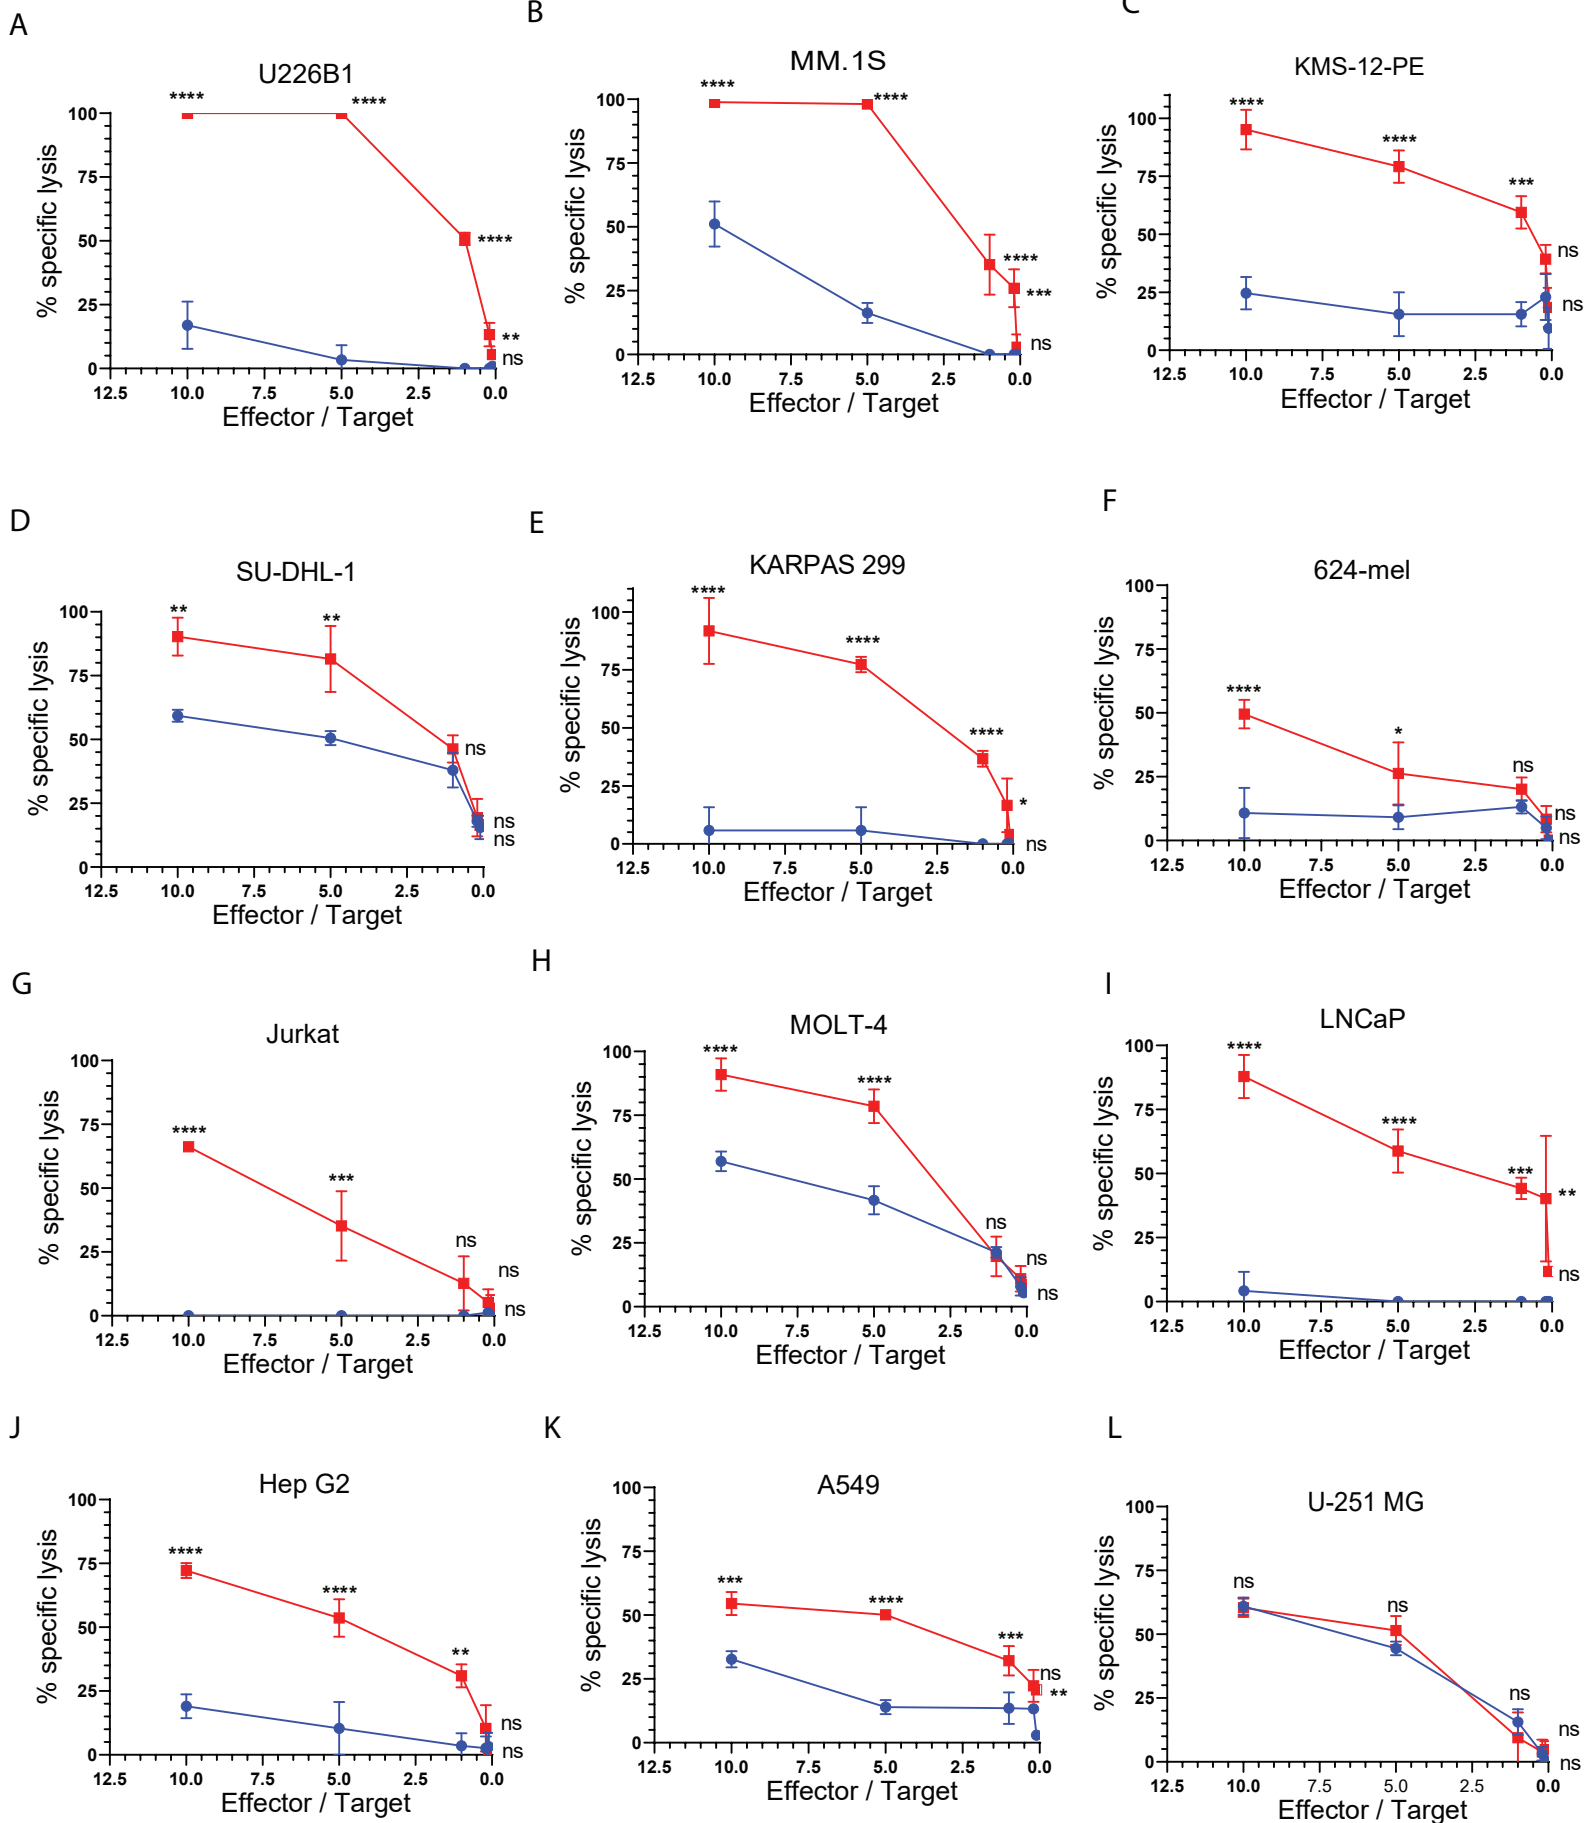

Figure 3

● Mock T-cell      ■ CAR-T-cell

**A**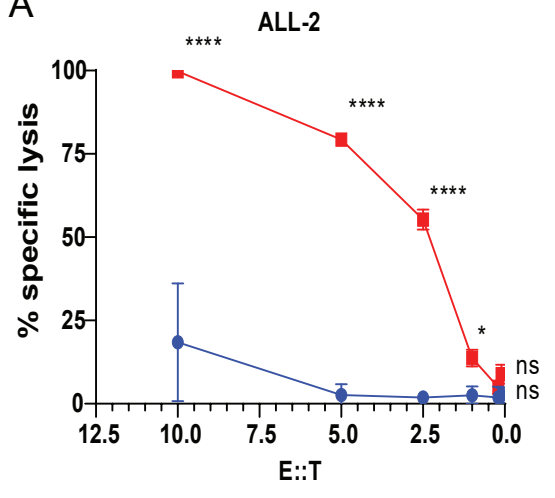**B**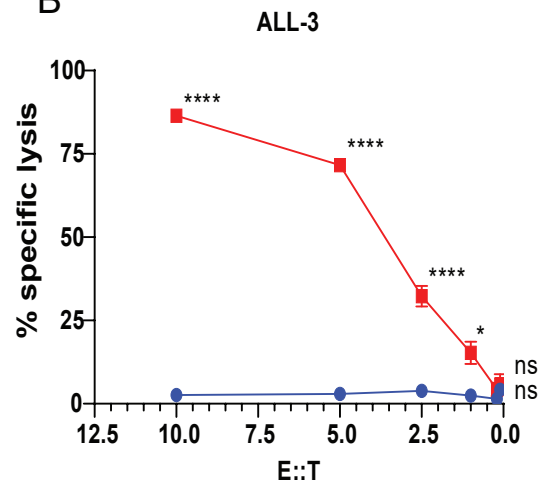**C**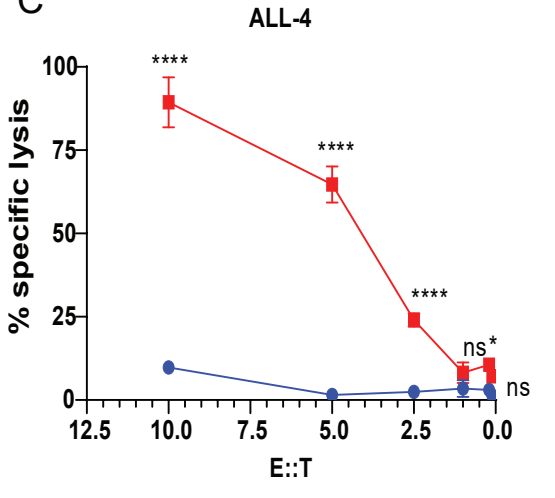**D**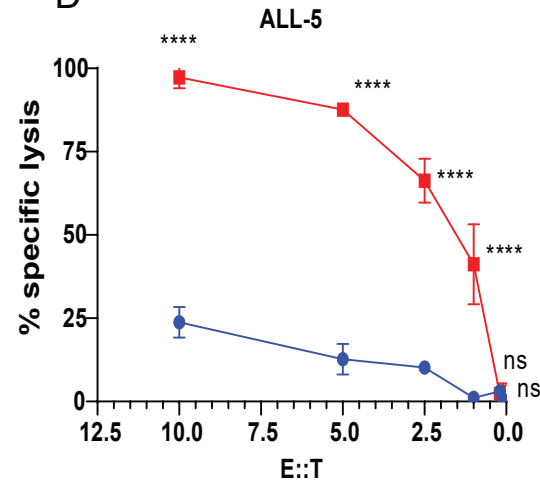

● Mock T-cell  
 ■ CAR-T-cell

Figure 4

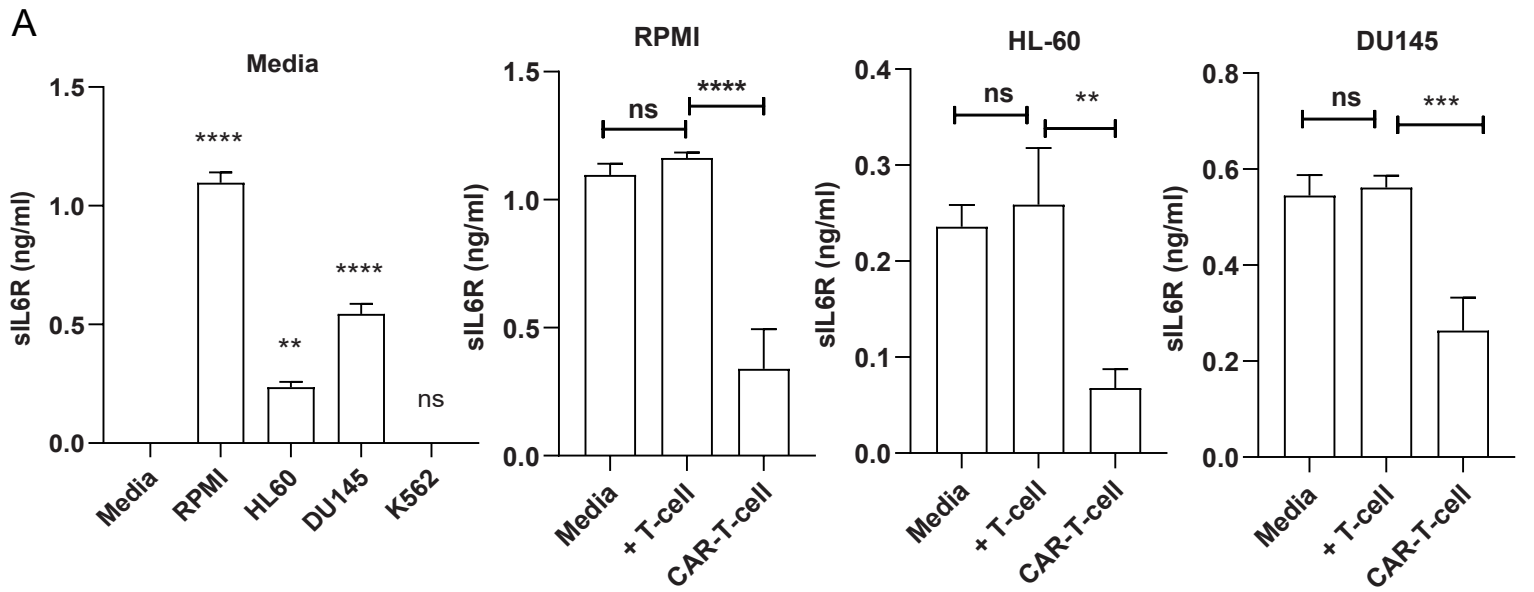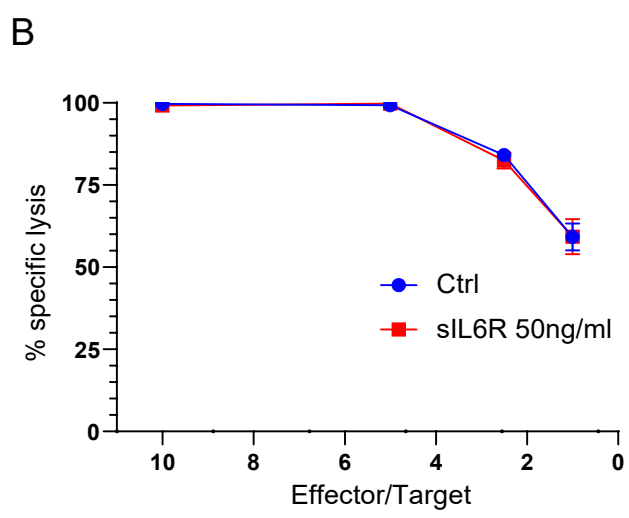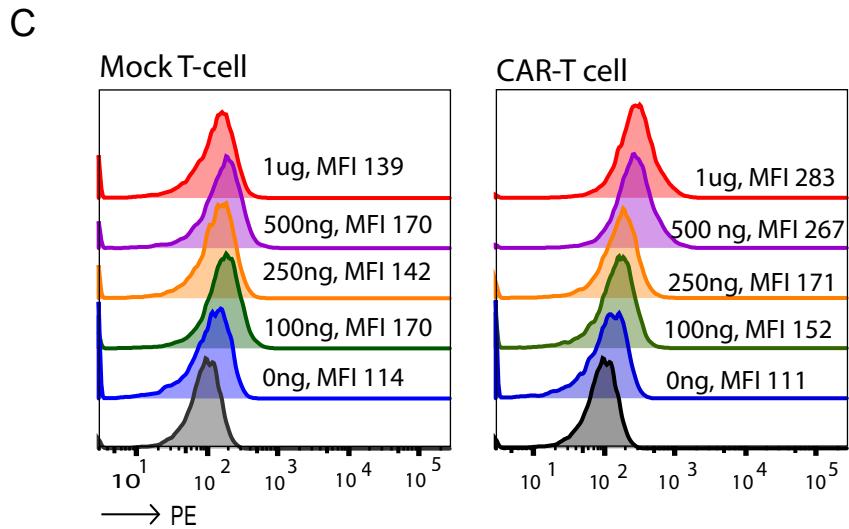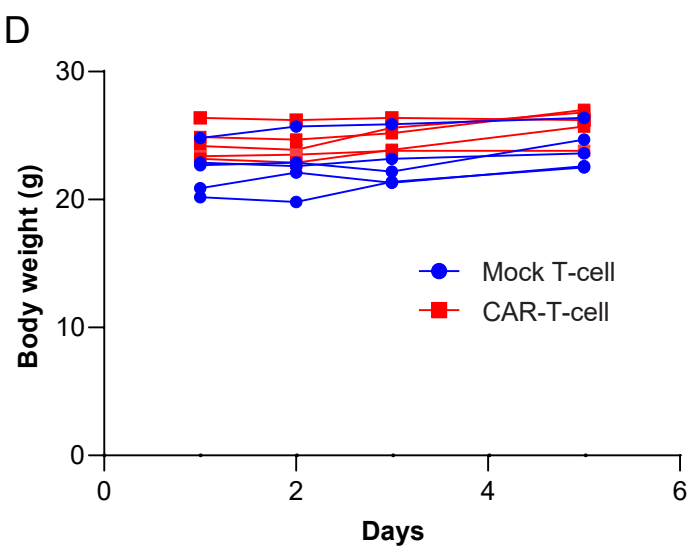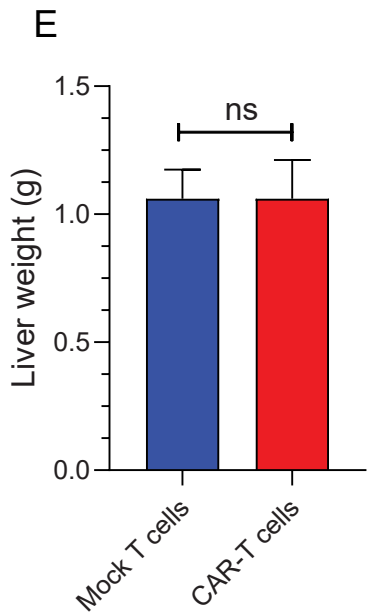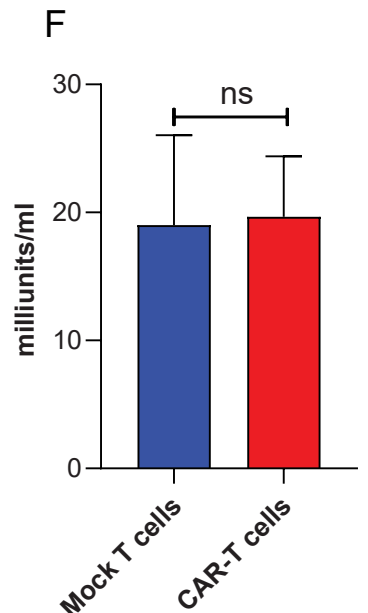

Figure 5



A

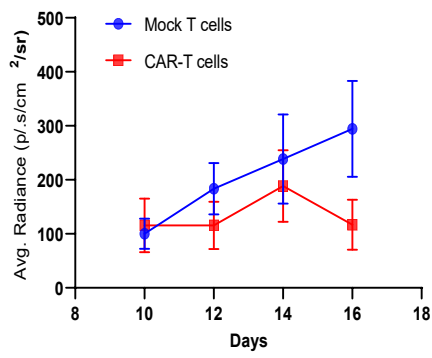

B

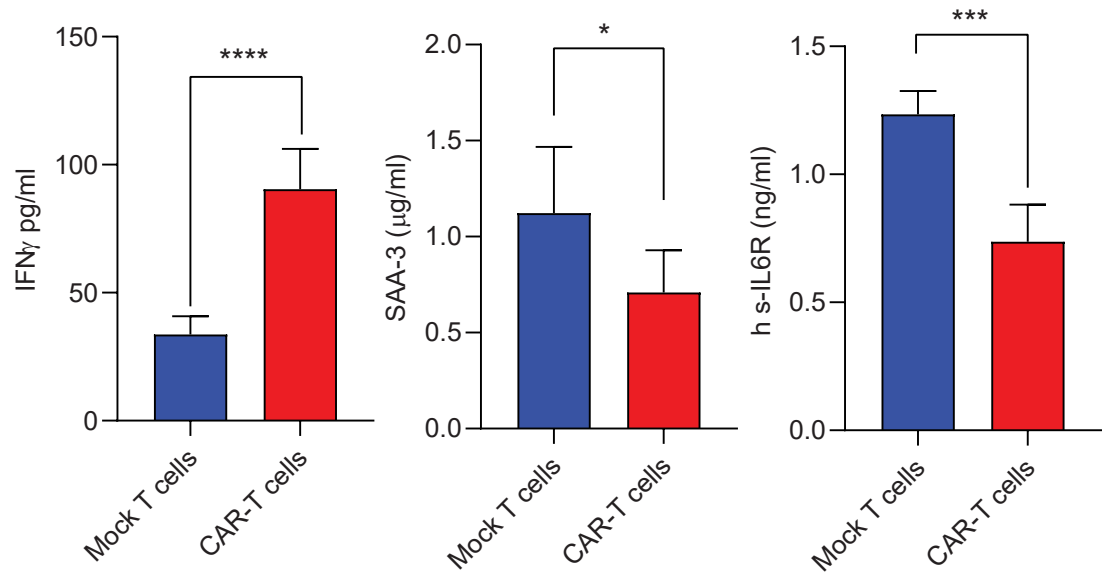

C

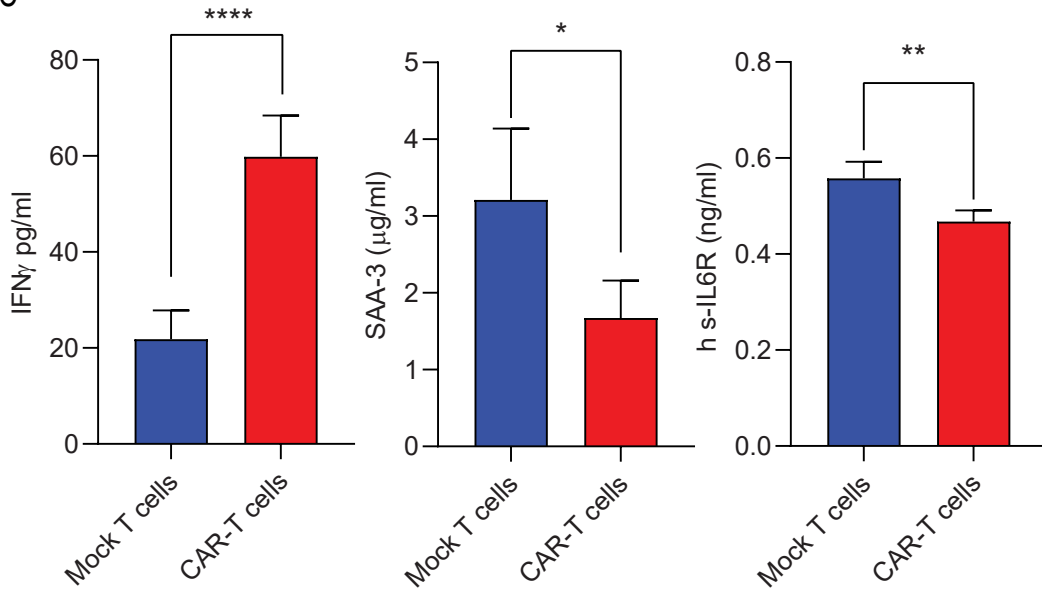

D

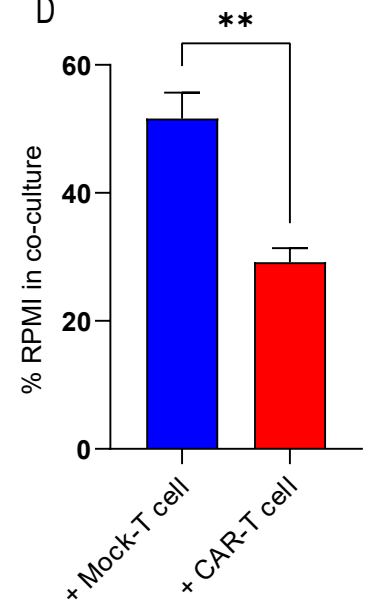

E

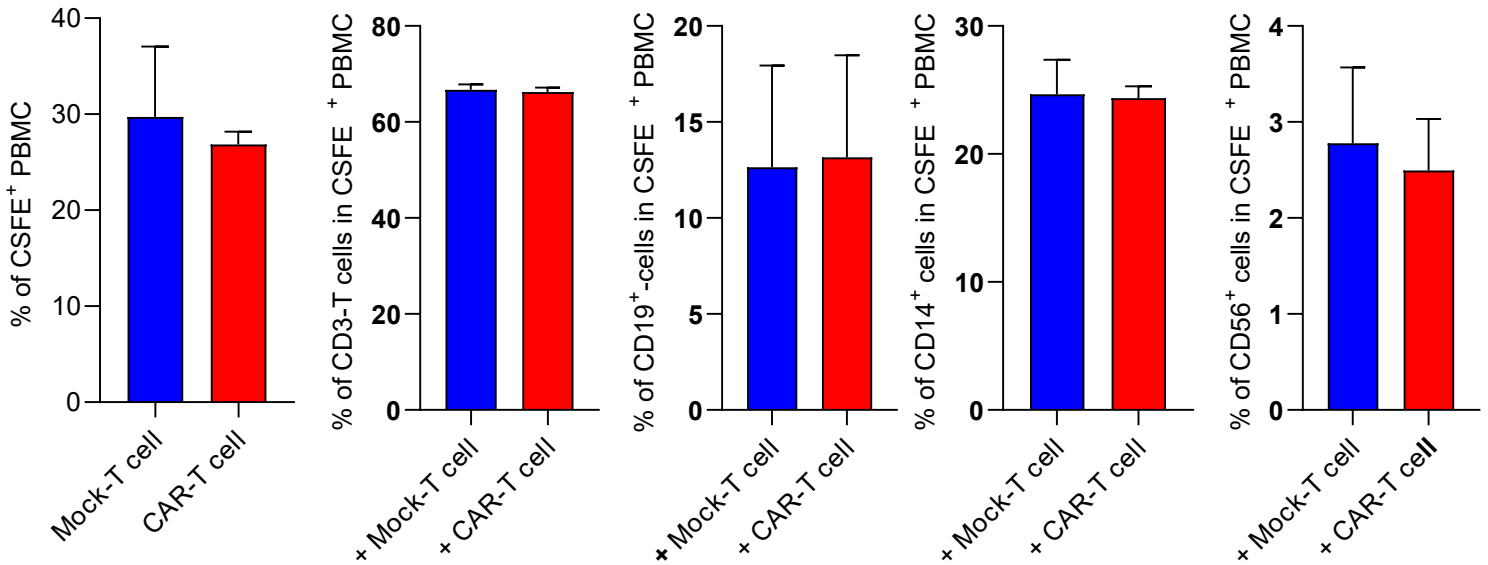

Figure 6
